# Supplementary material
Source: PubMed Central journal article supplement (PMC4286198)
Supplement: NIHMS652407-supplement-supplement_1.pdf [file NIHMS652407-supplement-supplement_1.pdf]

## Supplementary Information

Table 1. Primers used to PCR amplify the T-DNA insertion into *C. neoformans* genome (MAV30-MAV33) and to generate the fusion PCR to delete the *URA4* gene using the Geneticin-resistance gene as marker.

| Name   | Sequence                                           | Reference                    |
|--------|----------------------------------------------------|------------------------------|
| MAV30  | 5' GTAAAACGACGGCCAG 3'                             | Idnurm <i>et al.</i> (2004). |
| MAV31  | 5' CAGGAAACAGCTATGAC 3'                            |                              |
| MAV32  | 5' AACAGTTGCGCAGCCTGAATG 3'                        |                              |
| MAV33  | 5' AGAGGCGGTTTGCGTATTGG 3'                         |                              |
| MAV067 | 5' GTGATCAGTGCATTGCATGA 3'                         | deletion construct           |
| MAV070 | 5' CGGAGATGTTCGAGGAAGTGAGAAGAGATGTAGAACTAGCTTCC 3' |                              |
| MAV072 | 5' TTATTGAGCAATTTCCCAACC 3'                        |                              |
| MAV097 | 5' ACAGGAAACAGCTATGACATGCGTGATATATCTGTGTTCCG 3'    |                              |
| MAV098 | 5' CGAACACAGATATATCACGCATGTCATAGCTGTTTCCTGT 3'     |                              |
| MAV099 | 5' TGGCACTGGCCGTCGTTTTACACAGGATATCTATATTGATAG 3'   |                              |

Table 2. Real time PCR primers:

| Gene         | Name   | Sequence                     | Reference                 |
|--------------|--------|------------------------------|---------------------------|
| <i>URA1</i>  | MAV203 | 5' TGCAAGCAGAGCTGTTCCGGC 3'  | current work              |
|              | MAV204 | 5' GGTTACCAGGCTGGGGTTCG 3'   |                           |
| <i>URA2</i>  | MAV234 | 5' GATTGTGTCTAGATCTGACG 3'   |                           |
|              | MAV202 | 5' GCCATTCGGACGAAAAGACC 3'   |                           |
| <i>URA3</i>  | MAV199 | 5' TATGGTCAAGACGCACTGCG 3'   |                           |
|              | MAV200 | 5' AACCGTGTGCCGATATCGG 3'    |                           |
| <i>URA4</i>  | MAV197 | 5' TCAAAGGTGTCAAGTCCTAC 3'   |                           |
|              | MAV198 | 5' TTGAGATGTTCTTGTGAGCG 3'   |                           |
| <i>URA5</i>  | MAV195 | 5' AAGTCCGGCCGTCAATCCCC 3'   |                           |
|              | MAV196 | 5' CCTCACCATGGTCCTTCTTC 3'   |                           |
| <i>URA6</i>  | MAV243 | 5' CTCAAGGAGCTTGATGGTAAC 3'  |                           |
|              | MAV244 | 5' GCACCTTTCGGCTGGTGACC 3'   |                           |
| <i>URK1</i>  | MAV189 | 5' GTCCGGAAAGACTTCTGTAG 3'   |                           |
|              | MAV190 | 5' TAGACCGGGATCTCTGTAGC 3'   |                           |
| <i>URH1</i>  | MAV191 | 5' TCGTACTTTCATGGTCCAG 3'    |                           |
|              | MAV192 | 5' CGATGTTTGTCAATGGACCG 3'   |                           |
| <i>CDD1</i>  | MAV193 | 5' CAGTAATCCAGCTTATGCCC 3'   |                           |
|              | MAV194 | 5' GGGAATATCTGACTGCCTTC 3'   |                           |
| <i>GPDH1</i> | MAV240 | 5' AGTATGACTCCACACATGGTCG 3' | Varma <i>et al</i> (1999) |
|              | MAV241 | 5' AGACAAACATCGGAGCATCAGC 3' |                           |

S1

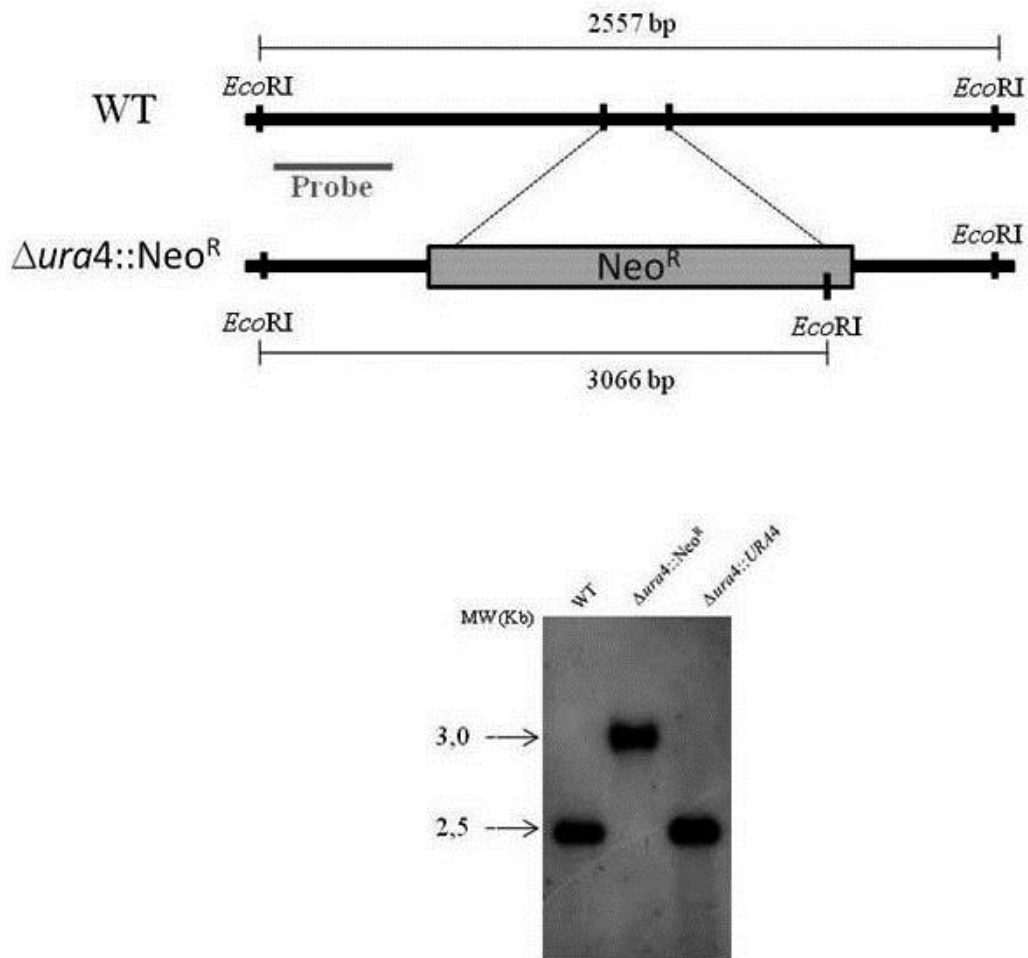

Figure S1: Deletion of *C. neoformans URA4* gene. (A) *EcoRI* restriction pattern of the wild type and *ura4* locus. The orange box represents the G418 resistance gene ( $Neo^R$ ) which replaced part of the ORF. The blue line represents the position of the probe used in the Southern blot. (B) Southern blot showing the bands which correlate to *EcoRI* restriction pattern: for wild type (KN99), *ura4::Neo<sup>R</sup>* (FGC003) and reconstituted strain *ura4 $\Delta$ ::URA4* (FGC003R1). Numbers and arrow indicate the size and position of the bands. WT = wild type; MW = molecular weight in kilobases; bp= base pairs.

A

MV49 CHROMAT\_ID=228877

194 aacatactacccccgtcgttaagggaa**atggaggaagaaggcatggctcgggaacatg**cgcgaggagaag**tccccag** 118  
 117 **tgacgctcacaagg**gtaagaccactcaatttggagaatatagaagtacgtaaagatcatcagaagaacagaa 41  
 40 **catctcaatcctcaatgccgaagttcacttctcgaacatctccgtaactcg** 1

B

atggaggaagaaggcatggctcgggaacatg**cgcgaggagaag**tccccag**tgacgctcacaag**  
 124 M E E E G M V G N M R G E V P S D A H K 143  
 aacatctcaatcctcaatgccgaagttcacttctcgaacatctccgt  
 144 N I S I L N A E V H F L E H L R 159

Figure S2. Insertion mutagenesis locus. The neomycin resistance cassette interrupted the *C. neoformans URA4* gene near the codon that encode the aminoacid argenine (R) at position 159. The sequenced region displayed represents the yielded sequence obtained from an inverted-PCR product from the locus where the cassette was inserted and it comprises an intron (shaded in gray) [A] that when spliced encoded the region represented in [B] from residue 124 to 159.

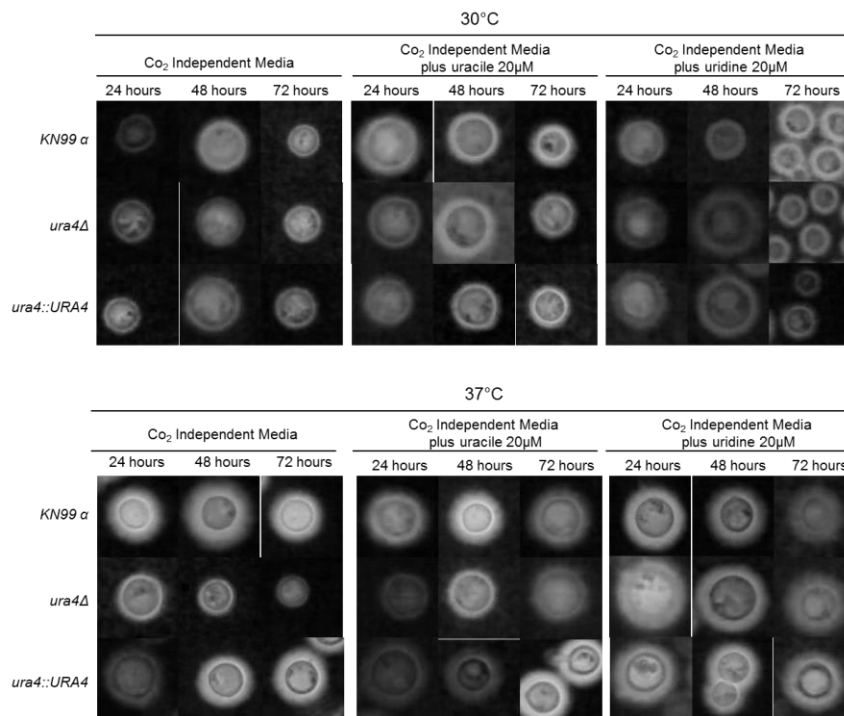

Figure S3 - Representative images for capsule production for *KN99α*, *ura4Δ* e *ura4+URA4* in CO<sub>2</sub>-independent medium supplemented with uracil (20μM) or uridine (20 μM) at 30°C [A] and 37°C [B].

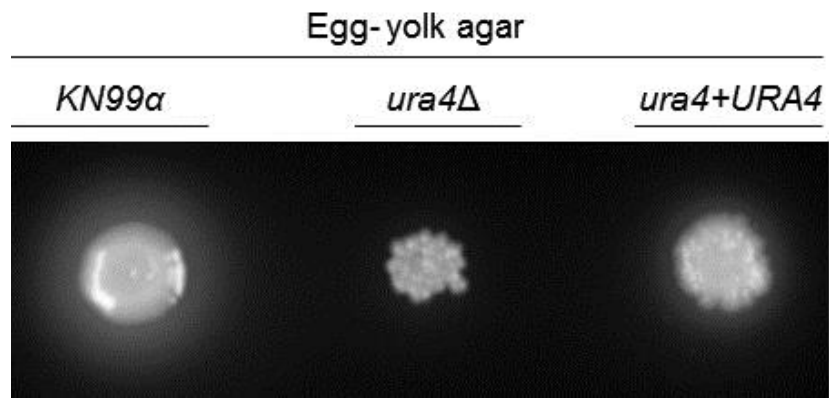

Figure S4. Extracellular phospholipase activity. Cultures were spotted on Egg-yolk agar plates and incubated at 30°C up to 72 hours. The halo observed around the colonies indicated the phospholipase activity and it was used to access the precipitation zone (Pz) on egg-yolk medium according to Price *et al.* (1982).
